# Supplementary material for: Hippocampal TERT Regulates Spatial Memory Formation through Modulation of Neural Development
Source: PubMed Central journal article supplement — Stem Cell Reports. 2017 Jul 27;9(2):543–56. doi: 10.1016/j.stemcr.2017.06.014 (PMC5550029; doi:10.1016/j.stemcr.2017.06.014), 2017-07-27
Supplement: mmc1.pdf [file mmc1.pdf]

**Stem Cell Reports, Volume 9**

**Supplemental Information**

**Hippocampal TERT Regulates Spatial Memory Formation through Modulation of Neural Development**

**Qi-Gang Zhou, Meng-Ying Liu, Han-Woong Lee, Fuyuki Ishikawa, Sushil Devkota, Xin-Ru Shen, Xin Jin, Hai-Yin Wu, Zhigang Liu, Xiao Liu, Xun Jin, Hai-Hui Zhou, Eun Jeoung Ro, Jing Zhang, Yu Zhang, Yu-Hui Lin, Hoonkyo Suh, and Dong-Ya Zhu**

1 **Supplementary Information**

2

3

4 **Hippocampal TERT regulates spatial memory formation**

5 **through modulation of neural development**

6

7 **Qi-Gang Zhou, Meng-Ying Liu, Han-Woong Lee, Fuyuki Ishikawa, Sushil Devkota, Xin-Ru**

8 **Shen, Xin Jin, Hai-Yin Wu, Zhigang Liu, Xiao Liu, Xun Jin, Hai-Hui Zhou, Eun Jeoung Ro,**

9 **Jing Zhang, Yu Zhang, Yu-Hui Lin, Hoonkyo Suh, Dong-Ya Zhu**

10

11 **Supplemental Figures**

12

13

14 **Figure S1.** Validation of the *Tert*<sup>-/-</sup> mice. Related to Figure 1

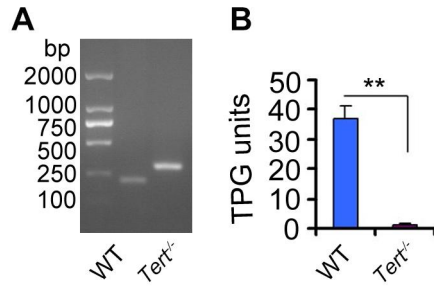

15

16

17

18 **Figure S2.** Latency to the platform in visible platform training. Related to Figure 1, 2, 6 and 7

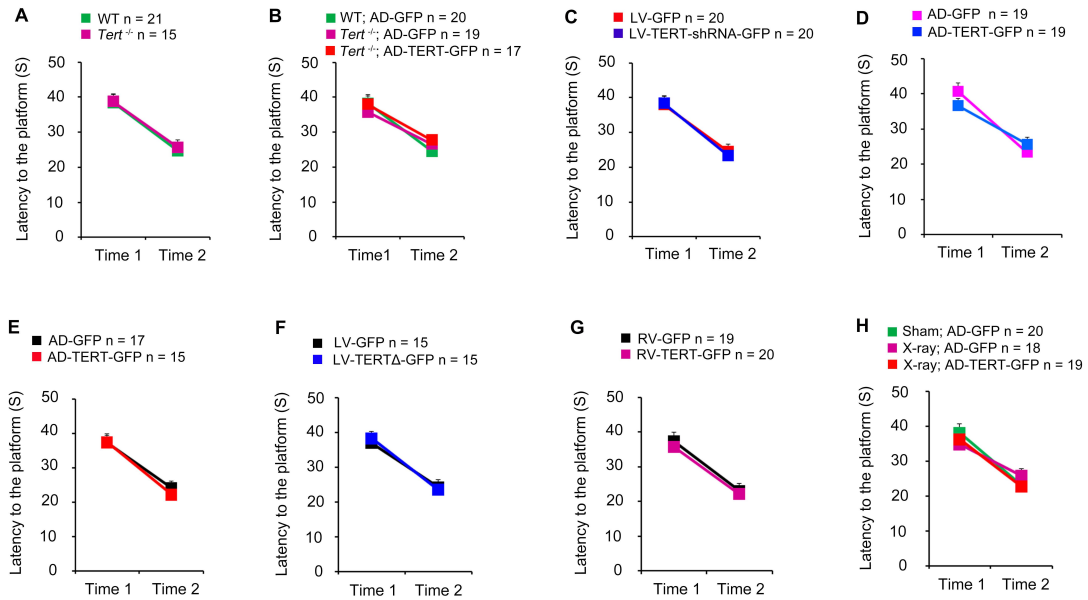

19

20

21

22

23

24

25

26

27

28

29

30 **Figure S3.** TERT expression dynamic induced by AD-TERT-GFP. Related to Figure 2

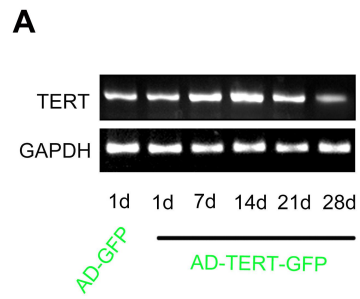

31

32

33

34 **Figure S4.** Validation of RV-TERT-GFP *in vivo* and *in vitro*. Related to Figure 4

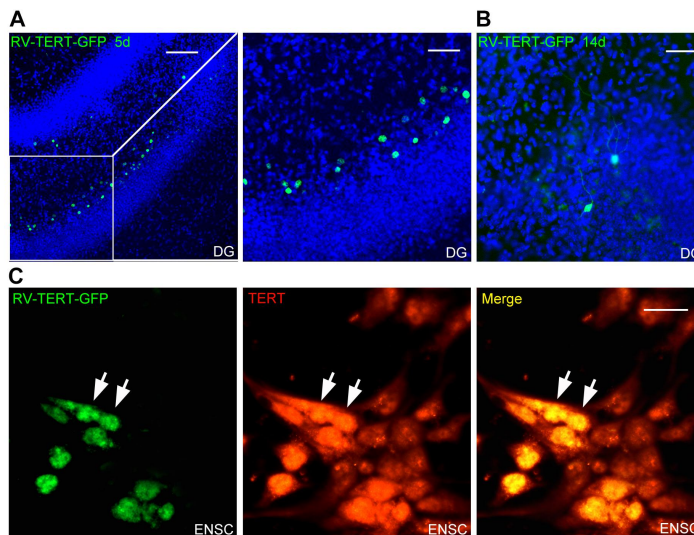

35

36

37

38

39

40

41

42

43

44

45

46

47

48

49 **Figure S5.** Cell types of LV-TERT-GFP infected cells in the DG. Related to Figure 7

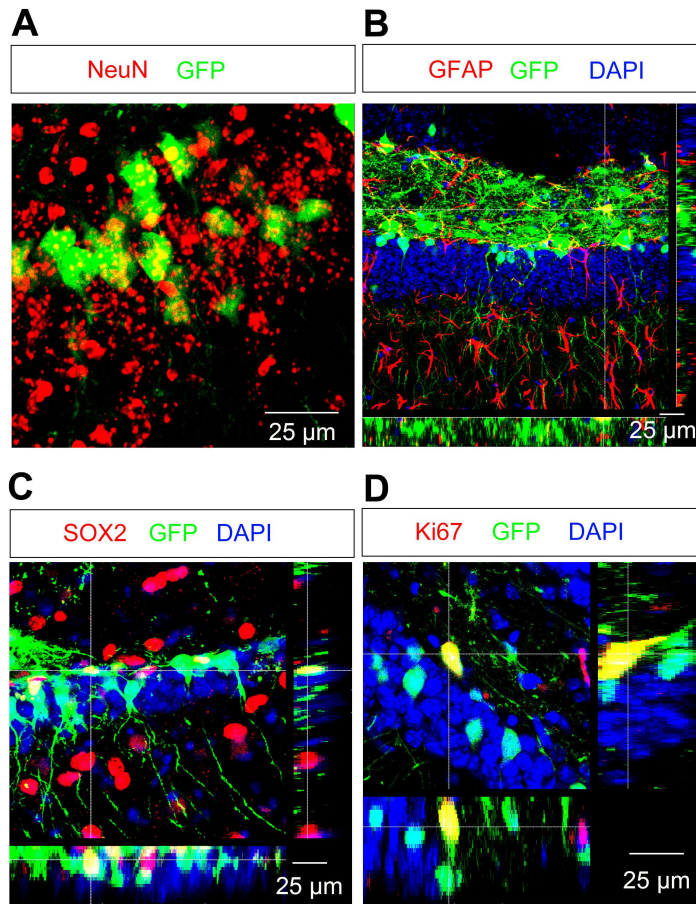

50  
51  
52  
53  
54  
55  
56  
57  
58  
59  
60  
61  
62  
63  
64  
65

66 **Figure S6.** X ray-irradiation causes cell death selectively in the sub-granular layer of the DG. Related to  
67 Figure 7  
68

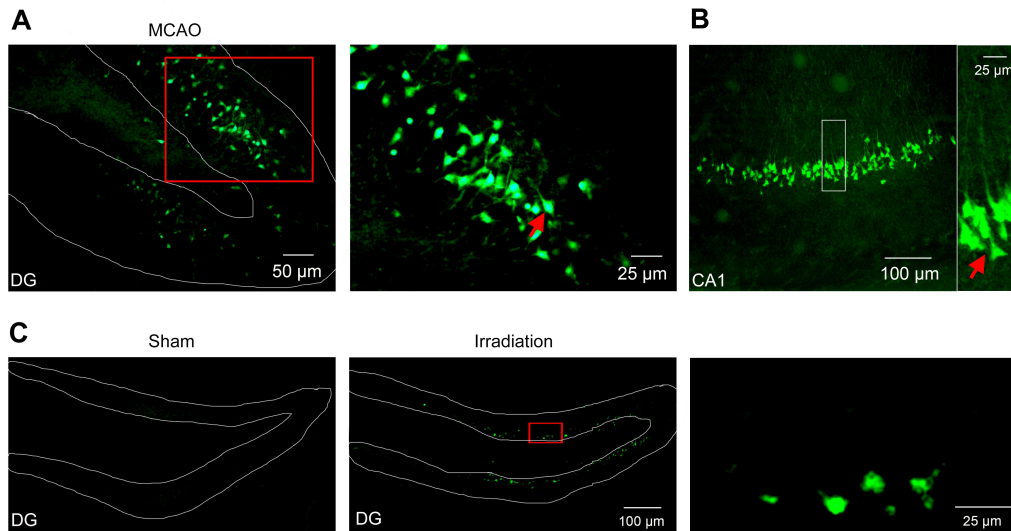

69  
70

71 **Figure S7.** Expression of shortened TERT with non-activity in the DG did not cause depression-related  
72 behavior. Related to Figure 6

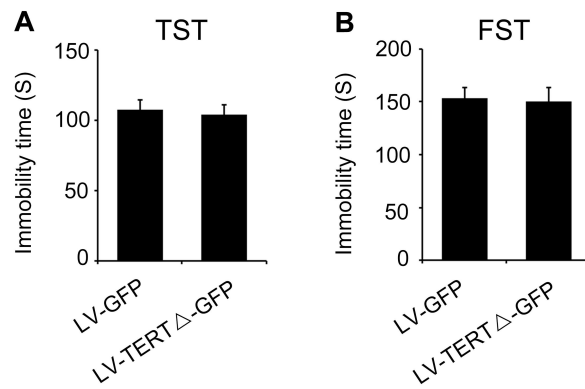

73  
74

75 **Table S1.** The swimming speeds in probe test of mice in each experiment. Related to Figure 1, 2, 6  
 76 and 7

| Experiments | Groups                                  | n  | Swim speed (mm/s)<br>Mean $\pm$ SEM | P value |
|-------------|-----------------------------------------|----|-------------------------------------|---------|
| Figure 1A   | WT                                      | 21 | 507.4667 $\pm$ 14.9994              | 0.2199  |
|             | <i>Tert</i> <sup>-/-</sup>              | 15 | 479.3620 $\pm$ 16.3210              |         |
| Figure 1E   | WT;LV-GFP                               | 20 | 445.1270 $\pm$ 15.7291              | 0.2430  |
|             | <i>Tert</i> <sup>-/-</sup> ;LV-GFP      | 19 | 451.6412 $\pm$ 18.0740              |         |
|             | <i>Tert</i> <sup>-/-</sup> ;LV-TERT-GFP | 17 | 413.9472 $\pm$ 15.7541              |         |
| Figure 1H   | LV-GFP                                  | 20 | 431.5740 $\pm$ 12.4375              | 0.5923  |
|             | LV-TERT-shRNA-GFP                       | 20 | 420.2310 $\pm$ 16.9280              |         |
| Figure 2A   | AD-GFP                                  | 19 | 452.5030 $\pm$ 22.5279              | 0.7358  |
|             | AD-TERT-GFP                             | 19 | 442.1970 $\pm$ 20.2784              |         |
| Figure 2B   | AD-GFP                                  | 17 | 457.2770 $\pm$ 9.8820               | 0.2354  |
|             | AD-TERT-GFP                             | 15 | 441.4620 $\pm$ 15.3795              |         |
| Figure 6E   | LV-GFP                                  | 15 | 439.3920 $\pm$ 10.4737              | 0.1592  |
|             | LV-TERT $\Delta$ -GFP                   | 15 | 447.8219 $\pm$ 12.3251              |         |
| Figure 7A   | RV-GFP                                  | 19 | 467.9337 $\pm$ 15.2172              | 0.3116  |
|             | RV-TERT-GFP                             | 20 | 489.0720 $\pm$ 13.5414              |         |
| Figure 7D   | Sham + AD-GFP                           | 20 | 458.0568 $\pm$ 12.9293              | 0.8916  |
|             | X ray + AD-GFP                          | 18 | 477.3935 $\pm$ 15.0006              |         |
|             | X ray + AD-TERT-GFP                     | 19 | 484.0584 $\pm$ 16.8535              |         |

77

78

79 **Movie S1.** Related to Figure 1

80 This movie showed the performance of a mouse in WT group in MWM test at day 5 during 5-day  
 81 training. The WT mouse found the platform in a short time.

82

83 **Movie S2.** Related to Figure 1

84 This movie showed the performance of a mouse in *Tert*<sup>-/-</sup> group in MWM test at day 5 during 5-day  
 85 training. The *Tert*<sup>-/-</sup> mouse did not found the platform.

86

87

88

89

90

91 **Supplemental Figure Legends**

92

93 **Figure S1. Validation of the *Tert*<sup>-/-</sup> mice (related to Figure 1).** (A) RT-PCR showing the genotype of  
94 the *Tert*<sup>-/-</sup> mice. (B) Deletion of telomerase activity in the embryonic stem cells from *Tert*<sup>-/-</sup> mice ( $n = 3$   
95 independent experiments,  $P = 0.0012$ , Student's *t*-test.). Error bars, s.e.m.

96

97 **Figure S2. Latency to the platform in visible platform training (related to Figure 1, 2, 6 and 7).** (A)  
98 Related to Figure 1A. (B) Related to Figure 1E. (C) Related to Figure 1H. (D) Related to Figure 2A. (E)  
99 Related to Figure 2B. (F) Related to Figure 6E. (G) Related to Figure 7A. (H) Related to Figure 7D.  
100 One-way ANOVA in (B and G) and Student's *t*-test in the others. Error bars, s.e.m.

101

102 **Figure S3. TERT expression dynamic induced by AD-TERT-GFP (related to Figure 2).** (A)  
103 RT-PCR showing the expression dynamic of TERT mRNA after injection of AD-TERT-GFP into the  
104 DG.  $n = 3$  independent experiments.

105

106 **Figure S4. Validation of RV-TERT-GFP *in vivo* and *in vitro* (related to Figure 4).** (A)  
107 Representative image of the DG infected by RV-TERT-GFP 5 days after RV infection. On the right: a  
108 high-magnification image from the box area, showing the location of RV-TERT-GFP in the  
109 sub-granular layer. (B) Representative image of the DG infected by RV-TERT-GFP 14 days after RV  
110 infection. Note that the major GFP fluorescence was observed in the cell body. (C) Representative  
111 image of the cultured NSCs infected by RV-TERT-GFP (left) with immunostaining with anti-TERT  
112 primary antibody (middle). The merge of RV-TERT-GFP signal with TERT immunostaining signal  
113 (yellow) was shown (right). Note: the signal of TERT in the NSCs infected by RV-TERT-GFP (arrow  
114 indicated) was significantly stronger than others, indicating an enhancement of TERT expression in  
115 NSCs by RV-TERT-GFP 24 hours after infection in NSCs culture. Scale bars: A (left), 100  $\mu\text{m}$ ; A  
116 (right) and B, 50  $\mu\text{m}$ , C, 25  $\mu\text{m}$ .

117

118 **Figure S5. Cell types of LV-TERT-GFP infected cells in the DG (related to Figure 7).** (A)  
119 Representative photo showing that NeuN<sup>+</sup> neurons located at the granular layer were infected by  
120 LV-TERT-GFP. (B) Representative photo showing that GFAP<sup>+</sup> astrocytes in the hillus were infected by  
121 LV-TERT-GFP. (C) Representative photo showing that SOX2<sup>+</sup> cells located in the sub-granular layer  
122 were infected by LV-TERT-GFP. (D) Representative photo showing that Ki67<sup>+</sup> cells located in the  
123 sub-granular layer were infected by LV-TERT-GFP.

124

125 **Figure S6. X ray-irradiation causes cell death selectively in the sub-granular layer of the DG**  
126 **(related to Figure 7).** (A) Representative photos showing FJ-positive cells located in the DG 7 days  
127 after MCAO. A magnification of the box area was shown on the right. Red arrow indicated that



128 FJ-positive cells located in the granular layer with neuronal morphology. **(B)** Representative photos  
129 showing FJ-positive cells located in the CA1 7 days after MCAO. A magnification of the box area was  
130 shown on the right. Red arrow indicated that FJ-positive cells located in the granular layer with  
131 neuronal morphology. **(C)** Representative photos showing FJ-positive cells in the DG of mice  
132 with/without exposure to irradiation. A magnification of the box area was shown on the right. Red  
133 arrow indicated that FJ-positive cells located in the granular layer with the morphology of NPCs.  $n = 3$   
134 independent experiments.

135

136 **Figure S7. Expression of shortened TERT with non-activity in the DG did not cause**  
137 **depression-related behavior (related to Figure 6).** (A) Bar graph showing the immobility time of  
138 mice in TST 28 days after injection of LV-GFP or LV-TERT $\Delta$ -GFP into the DGs.  $n = 15$ .  $P = 0.7148$ .  
139 Student's  $t$ -test. (B) Bar graph showing the immobility time of mice in FST 28 days after injection of  
140 LV-GFP or LV-TERT $\Delta$ -GFP into the DGs.  $n = 15$ .  $P = 0.8810$ . Student's  $t$ -test.

141

142

143

144

145

146

147

148

149

150

151

152

153

154

## 155 **Supplemental Experimental Procedures**

156

### 157 **Genotyping**

158 Genotyping Primers of *Tert*<sup>-/-</sup> mice: (1) gcg tgg agt atc ctc ctg cat ctc ta, (2) ctg tct cct aaa gga ctt gtg  
159 gac tt, (3) agg att ggg aag aca ata gca ggc at. The primer stock should be diluted to make 100  
160 picomoles/  $\mu$ l. Then mix 10  $\mu$ l of each primer 1, 2, and 3 with 70  $\mu$ l 3-distilled water to make final  
161 volume of 100  $\mu$ l. This 100  $\mu$ l is the working stock. 1  $\mu$ l of the working stock can be used for 1 PCR  
162 reaction. PCR cycles: 32 cycles. Denaturation: 94 °C, 30 sec. Annealing: 55 °C, 30 sec. Extension: 72  
163 °C, 1 min. Final extension: 72 °C, 10 min.

164

### 165 **Virus construction**

166 RV-TERT-GFP The sequence of TERT-GFP in the plasmid pDC315-TERT-GFP was cutted by using  
167 restriction enzymes and inserted into the plasimd pCAG-GFP (For RV-GFP) by T4 DNA ligase to  
168 replace the sequence of GFP in pCAG-GFP. GFP was fused to the C-terminal of TERT. The plasmid  
169 was named as pCAG-TERT-GFP, which was used to identify by DNA sequencing. Using 100 $\mu$ l  
170 Lipofectamine 2000, 293T cells were co-transfected with 22.5  $\mu$ g of pCAG-TERT-GFP, 15  $\mu$ g of  
171 pCMV-GP, and 7.5  $\mu$ g of pCMV-VSVG to generate the recombinant retrovirus, RV-TERT-GFP. After  
172 48 h, supernatant was harvested from 293T cells, filtered at 0.45  $\mu$  m, and pelleted by  
173 ultracentrifugation at 18000  $\times$  g for 2 h at 4 °C. After resuspension by PBS, serially diluted retrovirus  
174 was used to transduce 293T cells; 4 days later, labeled 293T cells were counted to calculate the viral  
175 titer ( $\sim 2 \times 10^7$  transducing units/ml). As a control, we also generated a retroviral vector that expresses  
176 GFP (RV-GFP) or RFP (RV-RFP) alone.

177 AD-TERT-GFP Briefly, the coding sequence of mouse TERT was amplified by RT-PCR. The  
178 primer sequences were as follows: forward,

179 5'-GTAGAACGCAGATCGAAT-TCATGACCCGCGCTCCTCG-3'; reverse,

180 5'-CCCTTGCTCACCATG-AATTCGTCCAAAATGGTCTGAAAGTC-3'. The PCR fragments and

181 the pDC315-GFP plasmid were digested with EcoR I and ligated with T4 DNA ligase to produce

182 pDC315-mTERT-IRES-GFP. The plasmid was used to trans-form competent DH5 $\alpha$  Escherichia coli

183 bacterial strains for identification. Using 100 $\mu$ l of Lipofectamine 2000 mixed with 50  $\mu$ l of DMEM,

184 HEK293 cells were cotransfected with 5  $\mu$ g of the pDC315-GFP plasmid with a cDNA encoding

185 mTERT and 5  $\mu$ g of the pBHG lox  $\Delta$ E1,3 Cre plasmid as a helper plasmid to generate the recombinant

186 adenovirus, AD-TERT-GFP. After 8 d, supernatant was harvested from HEK293 cells. After 3 times

187 the virus amplification, the supernatant was filtered at 0.45 $\mu$ m and purified using the Adeno-X Virus

188 Purification kit. After resuspension, serially diluted adeno-virus was used to transduce HEK293 cells.

189 Seven days later, labeled HEK293 cells were counted to calculate the viral titer ( $\sim 2.5 \times 10^{10}$  pfu/ml).

190 As a control, we also generated a adenoviral vector that expresses GFP alone (AD-GFP).

191 LV-TERT-GFP and LV-TERTΔ-GFP Briefly, the coding sequence of mouse TERT was amplified by  
192 RT-PCR. The primer sequences were as follows: forward,  
193 5'-GTAGAACGCAGATCGAAT-TCATGACCCGCGCTCCTCG-3'; reverse,  
194 5'-CCCTTGCTCACCATG-AATTCGTCCAAAATGGTCTGAAAGTC-3'. The PCR fragments was  
195 cutted by restriction enzymes and inserted into the plasmid pCMV-GFP (For LV-GFP) by T4 DNA  
196 ligase to replace the sequence of GFP in pCMV-GFP. GFP was under control of another promotor  
197 pUbi. Mice mTERTΔ gene was amplified by our previous constructed plasmid LV-TERT-GFP carrying  
198 the whole gene encoding TERT by deletion mutant PCR. The primer sequences were as follows:  
199 forward, 5'-GAGGATCCCCGGGTACCGGTGCCACCATGACCCGCGCTCCTCGTTGCC-3';  
200 reverse, 5'-TCCTTGTAGTCCATACCGTCCAAAATGGTCTGAAAGTCTGTGCTTAG -3'. The  
201 PCR fragments and the pGV287-GFP plasmid were digested with Age 1 and BamH 1 and ligated with  
202 T4 DNA ligase to produce LV-TERTΔ-GFP. Using 100μl Lipofectamine 2000, 293T cells were  
203 co-transfected with 20 μg of pCMV-TERT-GFP, 10 μg of VSVG, 7.5 μg of RSV-REV and 3.5 μg  
204 pMDL g/p RRE to generate the recombinant lentivirus, LV-TERT-GFP. After 48 h, supernatant was  
205 harvested from 293T cells, filtered at 0.45 μ m, and pelleted by ultracentrifugation at 18000 × g for 2 h  
206 at 4 °C. After resuspension by PBS, serially diluted retrovirus was used to transduce 293T cells; 4  
207 days later, labeled 293T cells were counted to calculate the viral titer (~ 2 × 10<sup>9</sup> transducing units/ml).  
208 As a control, we also generated a retroviral vector that expresses GFP alone (LV-GFP).

209 LV-TERT-shRNA-GFP Mouse TERT shRNA (m) Lentiviral Particles, we named it  
210 LV-TERT-shRNA-GFP, and its control shRNA Lentiviral Particles (LV) were purchased (Santa Cruz,  
211 CA, USA). LV-TERT-shRNA-GFP is a pool of concentrated, transduction-ready viral particles  
212 containing 4 target-specific constructs that encode 19- 25 nt (plus hairpin) shRNA designed to knock  
213 down gene expression. Each vial contains 200 μl frozen stock containing 1.0 × 10<sup>6</sup> infectious units of  
214 virus (IFU) in Dulbecco's Modified Eagle's Medium with 25 mM HEPES pH 7.3.

215 RV-SYN-GTR, RV-SYN-GT, and EnvA-ΔR-mCh The plasmids of RV-SYN-GTR and RV-SYN-GT  
216 were constructed based on the plasmids from Callaway's lab purchased from addgene ([Osakada and  
217 Callaway, 2013](#)). RV-SYN-GTR and RV-SYN-GT were produced by transient transfection of the  
218 RV-SYN-GTR or RV-SYN-GT vector (7.5 μg), CMVGagPol (5 μg) and CMV-VSVG (2.5 μg) in 60%  
219 confluent 293T cells grown in 10-cm plates for 5 hours. Virus-containing supernatant was harvested  
220 48 hours later. The final titers were estimated to be ~ 2 × 10<sup>7</sup> pfu/ml or ~ 1 × 10<sup>7</sup> pfu/ml as  
221 determined by infection of serially diluted virus into 293T cells. The production of EnvA-ΔR-mCh  
222 was carried out as described previously ([Osakada and Callaway, 2013](#); [Osakada et al., 2011](#)). Briefly,  
223 glycoprotein-gene-deleted rabies virus vector (ΔR-mCherry) was generated in which a mCherry  
224 reporter gene was replaced with the cDNA encoding the rabies virus glycoprotein. The helper cell line,  
225 BHK-EnvARGCD, was infected with ΔR-mCherry, to produce rabies virus pseudotyped with  
226 envelope protein EnvA. After 2 h and 4 h, the cells were washed with PBS three times and the media

227 reapplied. Supernatants containing  $\Delta$ R-mCherry rabies virus pseudotyped with EnvA were harvested 5  
228 days later, filtered and concentrated by ultracentrifugation. EnvA- $\Delta$ R-mCh titre was estimated to be  
229  $\sim 1.2 \times 10^7$  pfu/ml and diluted for use to  $\sim 4 \times 10^6$  pfu/ml.

230

### 231 **Western blot**

232 Western blot analysis of samples from cultured hippocampal neurons, NSC, and hippocampal tissues  
233 of animals was performed as described previously (Zhou et al., 2011b). The primary antibodies:  
234 Rabbit Anti-Flag (Bioss, bs-0287R), Mouse Anti-GAPDH (Kangchen Bio-Tech, kc-5G4), and Rabbit  
235 Anti-Synapsin 1 (Millipore, AB1543). Appropriate horseradish peroxidase-linked secondary  
236 antibodies were used for detection by enhanced chemiluminescence (Pierce).

237

### 238 **MCAO**

239 Focal cerebral ischemia was induced by MCAO, as described previously (Zhou et al., 2010). In brief,  
240 under chloral hydrate anesthesia (350 mg/kg, i.p.), a 8/0 surgical nylon monofilament with rounded tip  
241 was introduced into the left internal carotid artery through the external carotid stump, advanced 16–17  
242 mm past the carotid bifurcation until a slight resistance was felt. At this point, the intraluminal  
243 filament blocked the origin of the middle cerebral artery and occluded all sources of blood flow from  
244 the internal carotid artery, anterior cerebral artery, and posterior cerebral artery. Throughout the  
245 procedure, body temperature was maintained at  $37 \pm 0.5$  °C. The filament was left in place for 90 min  
246 and then withdrawn. In the sham-operated animals, the occluding filament was inserted 7 mm above  
247 the carotid bifurcation.

248

### 249 **Fluoro-Jade staining**

250 Neuronal degeneration and death were determined by Fluoro-Jade (FJ; Histo-Chem) staining (Zhou et  
251 al., 2011a). In brief, sections were washed and mounted on glass slides and dried overnight. The slides  
252 were immersed for 3 min in absolute ethanol solution, for 1 min in 70% ethanol solution, and for 1  
253 min in distilled water. Then, the slides were transferred into a solution containing 0.01% Fluoro-Jade  
254 and 0.1% acetic acid for 30 minutes on a shaker. After three 10 minutes washes, the slides were finally  
255 coverslipped for analysis.

256

### 257 **Immunocytochemistry**

258 Mice were anesthetized with with 0.07 ml of a mixture of ketamine (90.9 mg/ml) and xylazine (9.1  
259 mg/ml) and perfused transcardially with saline followed by about 50 ml of 4% paraformaldehyde  
260 (PFA). Brains were removed and postfixed overnight in 4% PFA. Serial sections (40 $\mu$ m) were made  
261 on an oscillating tissue slicer in a bath of physiological saline. Every sixth section throughout the  
262 hippocampus was processed for 5-bromo-2'-deoxyuridine (BrdU) (Rat, Bio-rad, OBT0030)  
263 immunohistochemistry as described previously. All the sections throughout the brain were collected

264 for tracing analysis. All the cells were counted in each section by another experimenter blinded to the  
265 study code. Other primary antibodies: Rabbit Anti-DCX (Santa Cruz Biotechnology, sc-28939),  
266 Rabbit Anti-GFAP (Abcam, ab7260), Mouse Anti-GFP (Santa Cruz Biotechnology, sc-101525),  
267 Rabbit Anti-RFP (Abcam, ab62341), Rabbit Anti-Ki67 (Abcam, ab66155), Rabbit Anti-SOX2  
268 (Abcam, ab97959), Rabbit Anti-NeuN (Cell Signaling, #24307), and Rabbit Anti-Synapsin 1  
269 (Millipore, AB1543).

270

#### 271 **RT-PCR**

272 Total mRNA was extracted from the hippocampus using Trizol reagent according to the  
273 manufacturer's instructions (Sigma). The primers used for RT-PCR: TERT: forward, 5'  
274 –ATGGCGTTCCTGAGTATG – 3', reverse, 5' –AGCCAGAGGCCTTTAGT – 3'; GAPDH: forward,  
275 5' – CAAGGTCATCCATGACAACCTTTG – 3', reverse, 5' – GTCCACCACCCTGTTGCTGTAG -  
276 3'. PCR conditions were 30 cycles of denaturation at 94°C for 45 s, annealing at 55°C for 45 s, and  
277 extension at 72°C for 45 sec. PCR products were separated by electrophoresis through 1.5% agarose  
278 gel containing 0.5% Ig/mL ethidium bromide and imaged using a BioDoc-IT imaging system  
279 (Bio-Rad); band intensities were determined using GS-710 calibrated imaging Densitometer  
280 (Bio-Rad). The mRNA for GAPDH was detected as a standard.

281

#### 282 **Telomerase activity assay**

283 Telomerase activity was detected using TRA-PEZE XL telomerase detection kit (Millipore, Billerica,  
284 MA) as described previously (Zhou et al., 2011a). Following the manufacturer's instructions,  
285 telomeric repeat amplification protocol reactions (TRAP) were performed using the TRAPEZE XL  
286 telomerase detection kits (Millipore) for analysis of the telomerase activity. The fluorescence energy  
287 transfer primers were used to generate fluorescently labeled TRAP products, quantitatively measured  
288 with a fluorescence plate reader (SpectraMax M2e) or visualized after terminal deoxynucleotidyl  
289 transferase-mediated dUTP nickend labeling on a 10% nondenaturing gel and SYBR Green I  
290 (Invitrogen) staining.

291

#### 292 **Analysis of spine density and morphology of neurons**

293 Images of GFP-labeled neurons or DCX<sup>+</sup> neurons were acquired at 1 μm intervals with the Leica  
294 confocal system with a plane apochromatic 40 × oil lens and a digital zoom of 1.5. The image files  
295 were used for reconstruction of the morphology with the Imaris v7.2.3 program. The length of each  
296 dendritic segment was determined by tracing the center of the dendritic shaft, and the number of  
297 spines was counted manually from the two-dimensional projections. The linear spine density was  
298 calculated by dividing the total number of spines by the length of the dendritic segment. For  
299 classification of mushroom spines, major and minor axes of each spine head were identified. When the

300 width size of the spine  $> 0.6 \mu\text{m}$ , the spines recognized as mushroom spines. Confocal imaging and  
301 data quantification were done by the same person, who was blinded to the experimental conditions.

302

### 303 **Stereotaxic surgery**

304 Mice were anesthetized with 0.07 ml of a mixture of ketamine (90.9 mg/ml) and xylazine (9.1 mg/ml)  
305 and placed in a stereotaxic apparatus. Stereotaxic surgery was performed to deliver viruses or drugs  
306 into the hippocampal DG (1  $\mu\text{l}$ , coordinates: 2.3 mm posterior to bregma, 1.35 mm lateral to the  
307 midline, and 2.3 mm below dura), The mice were recovered on hot pad (37 °C) until waken up and then  
308 returned back to homecages (Zhou et al., 2011).

309

### 310 **Hippocampal X-irradiation**

311 As described previously (Zhou et al., 2011), X-irradiation was performed. Briefly, mice were  
312 anesthetized with 0.07 ml of a mixture of ketamine (90.9 mg/ml) and xylazine (9.1 mg/ml). Then mice  
313 were placed in a stereotaxic apparatus and the hippocampal zone were exposed to cranial irradiation  
314 using therapeutic x-ray equipment operated at 300 kVp and 20 mA. Mice were protected with a lead  
315 shield that covered the entire body, with the exception of a  $3.2 \times 11$  mm treatment field above the  
316 hippocampus. The corrected dose rate was  $\approx 3$  Gy/min at a source-to-skin distance of 100 cm. The  
317 procedure lasted 1 min and 42 s, delivering a total of 5 Gy each time.

318

### 319 **Cell Cultures**

320 Primary hippocampal neurons were cultured from embryonic hippocampus, on embryonic day 18  
321 (E18), of WT or *Tert*<sup>-/-</sup> mice in neurobasal medium (Gibco) containing 2% B27 supplement as reported  
322 (Luo et al., 2010). NSCs differentiation was also performed from embryonic hippocampus on  
323 embryonic day 18 (E18), of WT or *Tert*<sup>-/-</sup> mice. Monolayer-cultured NSCs were allowed to  
324 differentiate in growth factor-free DMEM/F12 (1:1) medium containing 2% B27 and 0.5% fetal  
325 bovine serum. Four days later, the cultures were fixed and stained with DCX and GFAP antibodies to  
326 mark neurons and astrocytes, respectively. The percentages of neurons and astrocytes were calculated  
327 in 10 high-power fields systematically across the coverslip.

328

### 329 **Supplemental References**

330

331 Luo, C.X., Jin, X., Cao, C.C., Zhu, M.M., Wang, B., Chang, L., Zhou, Q.G., Wu, H.Y., and Zhu, D.Y.  
332 (2010). Bidirectional regulation of neurogenesis by neuronal nitric oxide synthase derived from neurons  
333 and neural stem cells. *Stem cells* 28, 2041-2052.

334 Osakada, F., and Callaway, E.M. (2013). Design and generation of recombinant rabies virus vectors. *Nature*  
335 *protocols* 8, 1583-1601.

336 Osakada, F., Mori, T., Cetin, A.H., Marshel, J.H., Virgen, B., and Callaway, E.M. (2011). New rabies virus

337 variants for monitoring and manipulating activity and gene expression in defined neural circuits. *Neuron* *71*,  
338 617-631.

339 Zhou, L., Li, F., Xu, H.B., Luo, C.X., Wu, H.Y., Zhu, M.M., Lu, W., Ji, X., Zhou, Q.G., and Zhu, D.Y.  
340 (2010). Treatment of cerebral ischemia by disrupting ischemia-induced interaction of nNOS with PSD-95.  
341 *Nature medicine* *16*, 1439-1443.

342 Zhou, Q.G., Hu, Y., Wu, D.L., Zhu, L.J., Chen, C., Jin, X., Luo, C.X., Wu, H.Y., Zhang, J., and Zhu, D.Y.  
343 (2011a). Hippocampal telomerase is involved in the modulation of depressive behaviors. *The Journal of*  
344 *neuroscience : the official journal of the Society for Neuroscience* *31*, 12258-12269.

345 Zhou, Q.G., Zhu, L.J., Chen, C., Wu, H.Y., Luo, C.X., Chang, L., and Zhu, D.Y. (2011b). Hippocampal  
346 neuronal nitric oxide synthase mediates the stress-related depressive behaviors of glucocorticoids by  
347 downregulating glucocorticoid receptor. *The Journal of neuroscience : the official journal of the Society for*  
348 *Neuroscience* *31*, 7579-7590.

349

350
